# Supplementary material for: A Review on Recent Approaches on Molecular Docking Studies of Novel Compounds Targeting Acetylcholinesterase in Alzheimer Disease
Source: MDPI journal article supplement (doi:10.3390/molecules28031084), 2023-01-21
Supplement: s1 [file s1]

**Table S1:** Compounds, reference compounds, inhibitory values and docking results [21, 25, 30-32, 35-38, 40, 42, 46, 48, 50, 62, 68, 70-71, 76-78, 82-83, 87, 92].

| Compounds | Reference compounds | IC <sub>50</sub> (compounds) | IC <sub>50</sub> (reference compounds) | Lab Test used            | Studied Binding Site |
|-----------|---------------------|------------------------------|----------------------------------------|--------------------------|----------------------|
| 1         | Donepezil           | 0.451 ± 0.012 µM             | 0.711 ± 0.017 µM                       | Healthy male Balb c mice | PAS & CAS            |
| 2         | Donepezil           | 0.466 ± 0.016 µM             | 0.711 ± 0.017 µM                       | Healthy male Balb c mice | PAS & CAS            |
| 3         | Donepezil           | 0.500 ± 0.018 µM             | 0.711 ± 0.017 µM                       | Healthy male Balb c mice | PAS & CAS            |
| 4         | Donepezil           | 0.590 ± 0.018 µM             | 0.711 ± 0.017 µM                       | Healthy male Balb c mice | PAS & CAS            |
| 5         | Galantamine         | 4.41± 0.53 µg/mL             | 6.27±1.15 µg/mL                        | Electrophorus electricus | PAS & CAS            |
| 6         | Galantamine         | 5.04 ±0.96 µg/mL             | 6.27±1.15 µg/mL                        | Electrophorus electricus | PAS & CAS            |
| 7         | Galantamine         | 0.420 ± 0.019 µM             | 1.142 ± 0.027 µM                       | Electrophorus electricus | PAS & CAS            |
| 8         | -                   | 22 ± 2.8 µM                  | -                                      | Electrophorus electricus | PAS & CAS            |
| 9         | -                   | 31.2 ± 1.8 µM                | -                                      | Electrophorus electricus | PAS & CAS            |
| 10        | -                   | 32 ± 2.4 µM                  | -                                      | Electrophorus electricus | PAS & CAS            |
| 11        | -                   | 36.9 ± 5.6 µM                | -                                      | Electrophorus electricus | PAS & CAS            |
| 12        | -                   | 37.6 ± 0.75 µM               | -                                      | Electrophorus electricus | PAS & CAS            |
| 13        | Tacrine             | 0.590 µM                     | 0.71 µM                                | Electrophorus electricus | PAS & CAS            |
| 14        | -                   | 1.66 ± 0.03 µM               | -                                      | Electrophorus electricus | PAS & CAS            |
| 15        | -                   | pIC <sub>50</sub> 8.092      | -                                      | -                        | PAS & CAS            |
| 16        | Donepezil           | 2.95 ± 1.31 µM               | 0.079 ± 0.05 µM                        | Electrophorus electricus | PAS & CAS            |
| 17        | -                   | 33.30 µM                     | -                                      | -                        | PAS & CAS            |
| 18        | Eserine             | 128.22± 0.17 µM              | 0.04 ± 0.0001 µM                       | Electrophorus electricus | PAS & CAS            |
| 19        | Eserine             | 16.43±0.48 µM                | 0.19 ± 0.05µM                          | Electrophorus electricus | PAS & CAS            |

|    |                             |                  |                               |                          |           |
|----|-----------------------------|------------------|-------------------------------|--------------------------|-----------|
| 20 | Eserine                     | 43.36 ±0.29µM    | 0.19 ± 0.05µM                 | Electrophorus electricus | PAS & CAS |
| 21 | Eserine                     | 11.73±0.49 µM    | 0.19 ± 0.05µM                 | Electrophorus electricus | PAS & CAS |
| 22 | tacrine                     | 2.75 µM          | 0.03 µM                       | Swiss Webster mice       | PAS       |
| 23 | Eserine                     | 5.41 ± 0.24 µM   | 0.19 ± 0.05µM                 | hAChE (HUMAN)            | PAS & CAS |
| 24 | Eserine                     | 14.29± 0.29 µM   | 0.19 ± 0.05µM                 | hAChE (HUMAN)            | PAS & CAS |
| 25 | Eserine                     | 26.75 ± 0.27 µM  | 0.19 ± 0.05µM                 | hAChE (HUMAN)            | PAS & CAS |
| 26 | Eserine                     | 13.47 ± 0.31 µM  | 0.19 ± 0.05µM                 | hAChE (HUMAN)            | PAS & CAS |
| 27 | Rivastigmine                | 54.2 ± 1.7 %     | 59.6 ± 2.6 %                  | Electrophorus electricus | PAS       |
| 28 | Donepezilb,<br>Galanthamine | 4.30 ± 0.3 µM    | Don: 0.041 µM<br>Gal: 1.65 µM | Electrophorus electricus | PAS & CAS |
| 29 | Donepezilb,<br>Galanthamine | 3.89 ± 0.3 µM    | Don: 0.041 µM<br>Gal: 1.65 µM | Electrophorus electricus | PAS & CAS |
| 30 | Donepezilb,<br>Galanthamine | 2.24 ± 0.4 µM    | Don: 0.041 µM<br>Gal: 1.65 µM | Electrophorus electricus | PAS & CAS |
| 31 | Tacrine                     | 0.099±0.008 µM   | 0.038±0.007 µM                | Electrophorus electricus | PAS & CAS |
| 32 | Tacrine                     | 506.62 nM        | 1116.74 nM                    | Electrophorus electricus | PAS & CAS |
| 33 | Tacrine                     | 397.32 nM        | 938.63 nM                     | Electrophorus electricus | PAS & CAS |
| 34 | Donepezil                   | 0.044 ± 0.002 µM | 0.052± 0.004 µM               | Electrophorus electricus | PAS & CAS |
| 35 | Donepezil                   | 7.58 ± 0.88 µM   | 0.052± 0.004 µM               | Electrophorus electricus | PAS & CAS |
| 36 | Donepezil                   | 4.10 ± 0.04 µM   | 0.052± 0.004 µM               | Electrophorus electricus | PAS & CAS |
| 37 | Donepezil                   | 9.71 ± 0.20 µM   | 0.052± 0.004 µM               | Electrophorus electricus | PAS & CAS |
| 38 | Donepezil                   | 2.70 ± 0.19 µM   | 0.052± 0.004 µM               | Electrophorus electricus | PAS & CAS |

|    |                          |                              |                                                                        |                           |           |
|----|--------------------------|------------------------------|------------------------------------------------------------------------|---------------------------|-----------|
| 39 | Tacrine,<br>Donepezil    | $4.17 \pm 0.36 \mu\text{M}$  | Tac: $0.30 \pm 0.02 \mu\text{M}$<br>Don: $0.033 \pm 0.002 \mu\text{M}$ | Recombinant<br>human AChE | PAS & CAS |
| 40 | Tacrine,<br>Donepezil    | $0.73 \pm 0.05 \mu\text{M}$  | Tac: $0.30 \pm 0.02 \mu\text{M}$<br>Don: $0.033 \pm 0.002 \mu\text{M}$ | Recombinant<br>human AChE | PAS & CAS |
| 41 | Galantamine              | $0.86 \pm 0.03 \mu\text{M}$  | $1.28 \pm 0.01 \mu\text{M}$                                            | -                         | PAS & CAS |
| 42 | Donepezil                | $1.98 \pm 0.004 \mu\text{M}$ | $0.59 \pm 0.083 \mu\text{M}$                                           | Electrophorus electricus  | PAS & CAS |
| 43 | Donepezil                | $3.53 \pm 0.42 \mu\text{M}$  | $0.59 \pm 0.083 \mu\text{M}$                                           | Electrophorus electricus  | PAS & CAS |
| 44 | Donepezil                | $1.89 \pm 0.28 \mu\text{M}$  | $0.59 \pm 0.083 \mu\text{M}$                                           | Electrophorus electricus  | PAS & CAS |
| 45 | Donepezil                | $5.58 \pm 0.72 \mu\text{M}$  | $0.59 \pm 0.083 \mu\text{M}$                                           | Electrophorus electricus  | PAS & CAS |
| 46 | Tacrine,<br>Galanthamine | $0.74 \pm 0.5 \mu\text{M}$   | Tac: $0.11 \pm 0.01 \mu\text{M}$<br>Gal: $0.59 \pm 0.13 \mu\text{M}$   | HuAChE                    | PAS       |
| 47 | Tacrine,<br>Galanthamine | $1.31 \pm 0.2 \mu\text{M}$   | Tac: $0.11 \pm 0.01 \mu\text{M}$<br>Gal: $0.59 \pm 0.13 \mu\text{M}$   | HuAChE                    | PAS       |
| 48 | Tacrine,<br>Galanthamine | $0.077 \pm 0.01 \mu\text{M}$ | Tac: $0.11 \pm 0.01 \mu\text{M}$<br>Gal: $0.59 \pm 0.13 \mu\text{M}$   | HuAChE                    | PAS       |
| 49 | Tacrine                  | 14.142 nM                    | 15.0652 nM                                                             | Electrophorus electricus  | PAS       |
| 50 | Galantamine              | $0.475 \pm 0.12 \mu\text{M}$ | $1.91 \pm 0.11 \mu\text{M}$                                            | Electrophorus electricus  | PAS       |
| 51 | Galantamine              | $0.547 \pm 0.34 \mu\text{M}$ | $1.91 \pm 0.11 \mu\text{M}$                                            | Electrophorus electricus  | PAS       |
